# Supplementary material for: Specific loss of CatSper function is sufficient to compromise fertilizing capacity of human spermatozoa
Source: PubMed Central journal article supplement (PMC4643530; doi:10.1093/humrep/dev243), 2015-10-08
Supplement: supp_dev243_dev243supp_fig1.pdf [file supp_dev243_dev243supp_fig1.pdf]

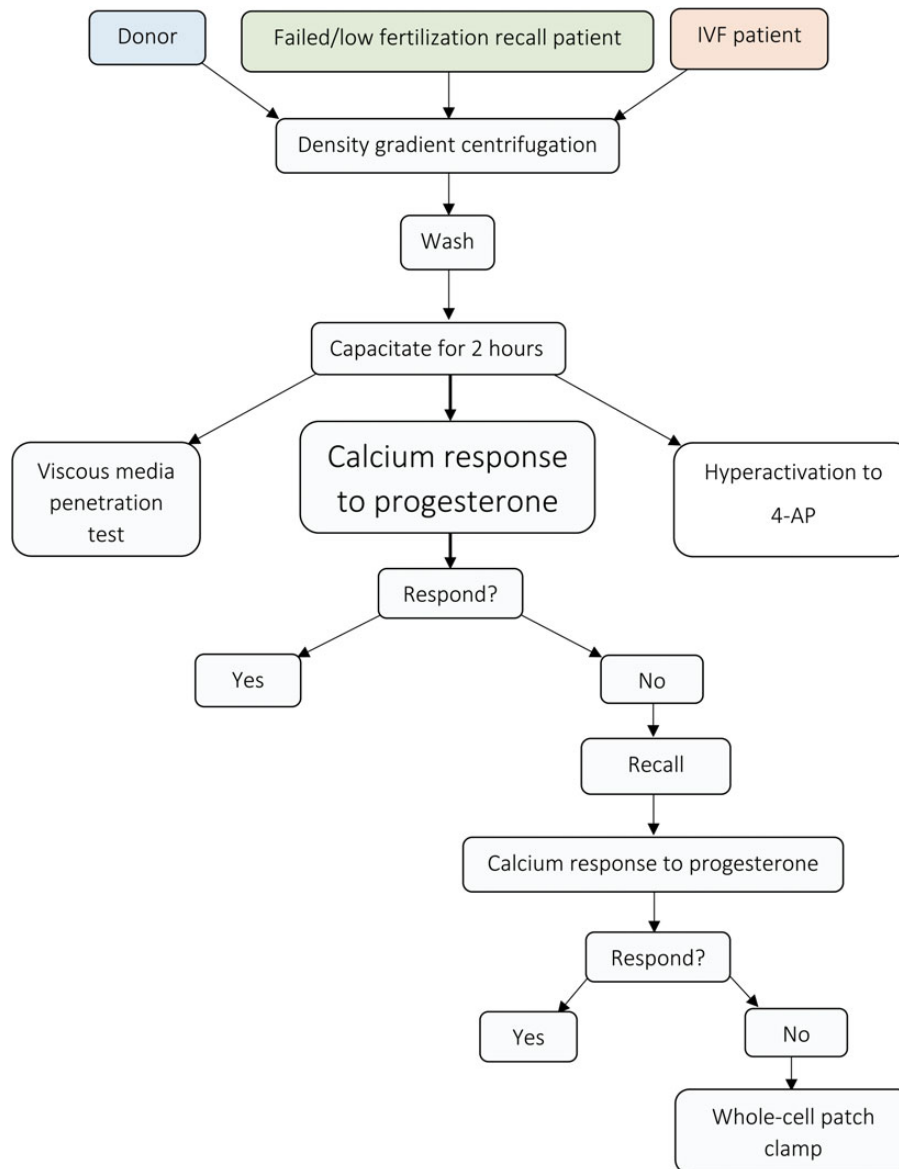

**Supplementary Figure S1** Experimental design. Semen from donors, IVF patients and those patients having previous failed/low fertilization at IVF (recall) was prepared using density gradient centrifugation and a wash step. The primary assay was the  $\text{Ca}^{2+}$  influx induced by progesterone. Depending on cell availability, the samples were then subjected to one or a combination of the progesterone-induced penetration into viscous media; 4-aminopyridine (4-AP)-induced hyperactivation (HA) assay. Spermatozoa from men with a defective  $\text{Ca}^{2+}$  response were asked to provide additional samples. In men where there was a consistent and robust failure of the  $\text{Ca}^{2+}$  influx induced by progesterone, i.e. repeatable in more than one semen sample, a direct assessment of CatSper function was performed using electrophysiology (patch clamping).
