# Supplementary material for: Specific loss of CatSper function is sufficient to compromise fertilizing capacity of human spermatozoa
Source: PubMed Central journal article supplement (PMC4643530; doi:10.1093/humrep/dev243), 2015-10-08
Supplement: supp_dev243_dev243supp_fig2.pdf [file supp_dev243_dev243supp_fig2.pdf]

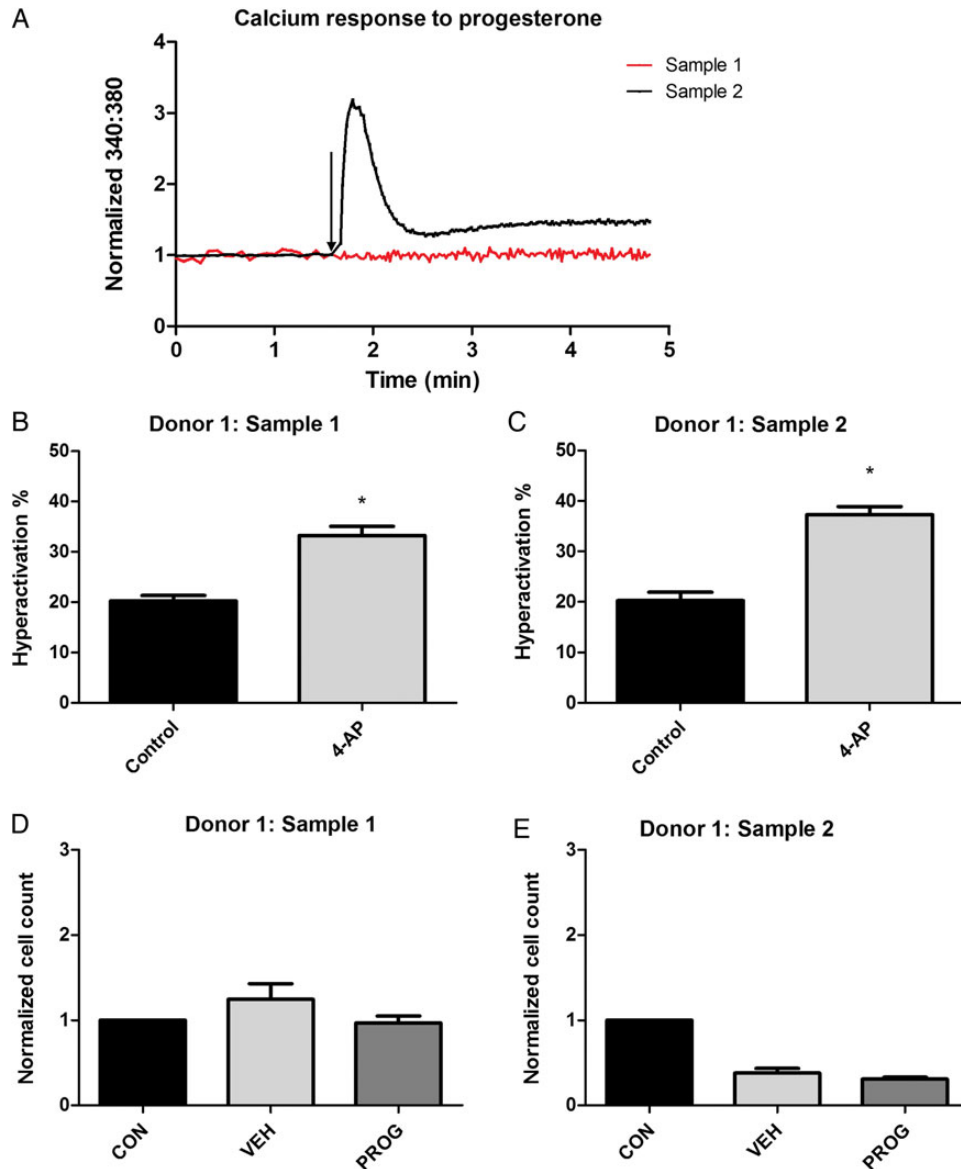

**Supplementary Figure S2** Spermatozoa from Donor 1 showed defective calcium response to progesterone, penetration into viscous media. Spermatozoa from the first semen sample produced by Donor 1 were defective in the  $\text{Ca}^{2+}$  influx induced by progesterone assay (**A**), and similarly showed an absence of response to progesterone in the penetration into a viscous medium (**D**). Hyperactivation (HA) was significantly higher after treatment with 4-aminopyridine (4-AP) (**B**,  $P = 0.0112$ ). Spermatozoa from the second semen sample showed a normal  $\text{Ca}^{2+}$  influx induced by progesterone (**A**), but penetration into a viscous medium was not enhanced by progesterone (**E**). HA was significantly higher after treatment with 4-AP (**C**,  $P < 0.001$ ).
