# Supplementary material for: Specific loss of CatSper function is sufficient to compromise fertilizing capacity of human spermatozoa
Source: PubMed Central journal article supplement (PMC4643530; doi:10.1093/humrep/dev243), 2015-10-08
Supplement: supp_dev243_dev243supp_table1.pdf [file supp_dev243_dev243supp_table1.pdf]

**Supplementary Table S1** Semen and prepared sperm analysis for Patient 1, Patient 2 and Donor 1.

|           | Semen              |            | Prepared sample    |            |                     |
|-----------|--------------------|------------|--------------------|------------|---------------------|
|           | Count (million/ml) | Motile (%) | Count (million/ml) | Motile (%) | Hyperactivation (%) |
| Patient 1 | 66 (54.65)         | 60 (16.5)  | 41 (33.85)         | 92 (5)     | 11 (2)              |
| Patient 2 | 80 (2)             | 55 (2.5)   | 20 (1.5)           | 87 (4.5)   | 28 (1.25)           |
| Donor 1   | 109 (8.85)         | 69 (16)    | 36 (2.4)           | 91 (1)     | 22 (1)              |

Data are mean ( $\pm$  SD).
