# Supplementary material for: Specific loss of CatSper function is sufficient to compromise fertilizing capacity of human spermatozoa
Source: PubMed Central journal article supplement (PMC4643530; doi:10.1093/humrep/dev243), 2015-10-08
Supplement: supp_dev243_dev243supp_table2.pdf [file supp_dev243_dev243supp_table2.pdf]

**Supplementary Table SII Single nucleotide polymorphisms (SNP) identified in candidate genes.**

| Gene     | SNP ID        | Allele change | Amino acid | Minor allele frequency | Coverage | Variant frequency % |
|----------|---------------|---------------|------------|------------------------|----------|---------------------|
| CATSPER1 | rs1203998     | G --> A       | G133S      | T = 0.3365             | 20       | 30                  |
|          | rs3814747     | G --> A       | V652I      | C = 0.0635             | 34       | 100                 |
| CATSPER2 | rs8042868     | G --> A       | V63I       | T = 0.2035             | 12       | 50                  |
|          | rs550866834   | A --> T       | V154G      | N/A                    | 65       | 47.7                |
| CATSPER3 | None detected |               |            |                        |          |                     |
| CATSPER4 | None detected |               |            |                        |          |                     |
| CATSPERB | rs72629402    | T --> C       | V248A      | G = 0.0561             | 11       | 81.8                |
| CATSPERD | rs61180947    | G --> A       | G639R      | A = 0.2296             | 11       | 36.4                |
| CATSPERG | rs139891538   | C --> T       | A5V        | T = 0.0004             | 12       | 41.7                |
| ATPIA4   | rs6427504     | G --> A       | G83D       | G = 0.3069             | 5        | 100                 |
|          | rs17368402    | G --> A       | E297K      | A = 0.0449             | 42       | 38.1                |
| ATP2B1-4 | None detected |               |            |                        |          |                     |
| CLGN     | None detected |               |            |                        |          |                     |
| IZUMO    | None detected |               |            |                        |          |                     |
| SLC9C1   | rs9809404*    | A --> G       | I348M      | T = 0.3570             | 41       | 43.9                |
|          | rs9809384*    | A --> G       | I364V      | T = 0.3570             | 58       | 32.8                |
|          | rs4434123     | C --> T       | T705I      | G = 0.1697             | 7        | 100                 |
|          | rs6781844     | C --> A       | Q732K      | G = 0.1699             | 7        | 100                 |
|          | rs74840030    | A --> G       | M844V      | C = 0.0369             | 16       | 43.8                |
|          | rs73853324    | T --> C       | V1058A     | G = 0.0531             | 16       | 43.8                |
| tACE     | None detected |               |            |                        |          |                     |
| TPCNI    | None detected |               |            |                        |          |                     |
| TPCN2    | rs2376558     | T --> C       | L564P      | T = 0.2470             | 18       | 100                 |
|          | rs896973      | G --> T       | V565F      | T = 0.3335             | 10       | 100                 |
|          | rs3829241     | G --> A       | G734E      | A = 0.1763             | 5        | 100                 |

Exome analysis of Patient 1 revealed no loss of function lesions in any genes of interest studied. Amino acid changes are given for the longest isoform. Asterisks indicate linked SNPs. MAF was derived from 1000 Genomes dataset. CatSper genes of interest are shown first followed by all other genes studied in alphabetical order.

Official Name, Full Name/Alias. CATSPER1-4, cation channel, sperm associated 1-4; CATSPERB, catsper channel auxiliary subunit beta; CATSPERD, catsper channel auxiliary subunit delta; CATSPERG, catsper channel auxiliary subunit gamma; ATPIA4, ATPase, Na<sup>+</sup>/K<sup>+</sup> transporting, alpha 4 polypeptide; ATP2B1-4, ATPase, Ca<sup>++</sup> transporting, plasma membrane 1/PMCA1-4; CLGN, Calmegin; SLC9C1, solute carrier family 9, subfamily C (Na<sup>+</sup>-transporting carboxylic acid decarboxylase), member 1/sNHE1; tACE, angiotensin I converting enzyme (testicular isoform); TPCNI-2, two pore segment channel 1-2, TPC1-2.
